# Supplementary material for: The Deoptimization of Rabies Virus Matrix Protein Impacts Viral Transcription and Replication
Source: PubMed Central journal article supplement (PMC7019236; doi:10.3390/v12010004), 2019-12-18
Supplement: viruses-12-00004-s001.pdf [file viruses-12-00004-s001.pdf]

## Supplemental data

### M gene of rHEP-G (GenBank ID: AB085828.1)

ATGAACTTTCTATGTAAGATAGTGA AAAACTGTAGGGATGAGGACACCCAAAAGCCCTCTC  
CCGCGTCAGCCCTCCGGATGGCGATGACCTGTGGCTTCCACCTCCAGAATATGTCCCGCTG  
AAAGAACTCACAAGCAAGAAGAACATGAGGAACTTTTGTATCAACGGGGAGGTAAAGTG  
TGCAGTCCGAACGGTTACTCATTGAGGATCCTGCGGCATATTCTGAGATCATTGACGAGAT  
ATACTCTGGGAATCATAGGATGATTGGGTTAGTCAAAGTTGTTGTTGGACTAGCTTTATCAG  
GAGCTCCAGCTCCTGAGGGCATGAACTGGGTATACAAATTGAGGAGAACCCTTATTTTCCA  
GTGGGCTGATTCCAGGGGCCCTCTTGAAGGGGAGGAGTTGGAACACTCTCAAGAGATCACT  
TGGGACGATGATACTGAATTCGTCCGATTGCAAATGAGAGTGAGCGCAAGACAATGTCAT  
ATTCAAGGCAGGATCTGGTGTATCGACATGAACTCGAGGGCATGTCAACTATGGTCTGACA  
TGTCTCTTCAGACACAAAGGTCTGAAGAGGACAAAGACTCTTCTCTGCTTTTAGAATAA

### Codon-optimized M

ATGAACTTCCTGTGCAAGATCGTGAAGA ACTGCAGGGACGAGGACACACAGAAGCCAAGC  
CCCGCCAGCGCACCACCTGACGGCGATGACCTGTGGCTGCCACCTCCAGAGTACGTGCCAC  
TGAAGGAGCTGACAAGCAAGAAGAACATGAGAACTTCTGCATCAACGGCGAGGTGAAG  
GTGTGCAGCCCAAACGGCTACAGCTTCAGGATCCTGAGACACATCCTGAGATCCTTCGACG  
AGATCTACTCTGGCAACCATCGGATGATTGGACTGGTGAAGGTGGTCGTGGGACTGGCCCT  
GTCTGGCGCCCCAGCCCTGAGGGCATGAACTGGGTGTACAAGCTGAGGAGAACACTGAT  
CTTCCAGTGGGCCGACAGCAGAGGCCCTCTGGAGGGCGAAGAGCTGGAGCACAGCCAGGA  
GATCACATGGGACGATGACACAGAGTTTGTGGCCTGCAGATGAGAGTGTCTGCTCGGCAG  
TGCCACATCCAGGGCAGAATCTGGTGCATCGACATGAACAGCAGGGCTTGCCAGCTGTGG  
AGCGACATGAGCCTGCAGACACAGAGGTCTGAGGAGGACAAGGACAGCAGCCTGCTCCTG  
GAGTAA

### Codon-deoptimized M

ATGAATTTCTTGTGTAAGATAGTAAAGAATTGTCGTGATGAAGACACGCAAAAAGCCGTCGC  
CCGCATCAGCGCCGCCAGATGGTGATGACTTGTGGCTACCGCCACCGGAATATGTTCCACT  
CAAAGAACTCACTTCGAAGAAGAATATGCGAACTTTTGCATAAATGGTGAAGTCAAGGT  
ATGTTCCGCAAATGGTTATTCGTTTCGGATACTACGACACATACTTCGTTTCGTTTGATGAAAT  
CTATTCGGGAAATCATCGAATGATAGGTCTAGTAAAGGTAGTTGTAGGGTTAGCGCTAAGT  
GGAGCGCCGGCACCAGAAGGAATGAATTGGGTCTACAAATTGCGACGCACGCTAATCTTC  
CAATGGGCGGATTTCGCGAGGACCACTCGAAGGGGAAGAGCTAGAACATTCACAAGAAAT  
AACATGGGATGACGATACGGAATTCGTTGGTCTCCAAATGAGAGTCTCGGCACGACAATGT  
CACATAAAGGAAGAATATGGTGTATAGACATGAATTCACGTGCGTGTCAACTCTGGTCCG  
ACATGTCGCTCCAAACGCAACGATCGGAAGAAGATAAAGATTTCGTCCTCCTTCTCGAATA  
A

### Alignment of the various M gene sequences

|                     |     |     |     |     |     |     |     |     |
|---------------------|-----|-----|-----|-----|-----|-----|-----|-----|
| M gene              | ATG | AAC | TTT | CTA | TGT | AAG | ATA | GTG |
| Codon-optimized M   | --- | --- | --C | --G | --C | --- | --C | --- |
| Codon-deoptimized M | --- | --T | --C | T-G | --- | --- | --- | --A |

AAA AAC TGT AGG GAT GAG GAC ACC  
--G --- --C --- --C --- --- --A  
--G --T --- C-T --- --A --- --G

CAA AAG CCC TCT CCC GCG TCA GCC  
--G --- --A AGC --- --C AGC --A  
--- --- --G --G --- --A --- --G

CCT CCG GAT GGC GAT GAC CTG TGG  
--A --T --C --- --- --- ---  
--G --A --- --T --- --- T-- ---

CTT CCA CCT CCA GAA TAT GTC CCG  
--G --- --- --- --G --C --- --A  
--A --G --A --G --- --- --T --A

CTG AAA GAA CTC ACA AGC AAGAAG  
--- --G --G --G --- --- ---  
--C -- --- --- --T TCG --- ---

AAC ATG AGG AAC TTT TGT ATC AAC  
--- --- --A --- --C --C --- ---  
--T --- C-A --- --- --C --A --T

GGG GAG GTT AAA GTG TGC AGT CCG  
--C --- --G --G --- --- --C --A  
--T --A --C --G --A --T TCG --A

AAC GGT TAC TCA TTC AGG ATC CTG  
--- --C --- AGC --- --- ---  
--T --- --T --G --T C-- --A --A

CGG CAT ATT CTG AGA TCA TTC GAC  
A-A --C --C --- --- --C --- ---  
--A --C --A --T C-T --G --T --T

GAG ATA TAC TCT GGG AAT CAT AGG  
--- --C --- --- --C --C --- C--  
--A --C --T --G --A --- --- C-A

ATG ATT GGG TTA GTC AAA GTT GTT  
--- --- --A C-G --G --G --G --C

```

--- --A --T C-- --A --G --A ---

GTT GGA CTA GCT TTA TCA GGA GCT
--G --- --G --C C-G --T --C --C
--A --G T-- --G C-- AGT --- --G

CCA GCT CCT GAG GGC ATG AAC TGG
--- --C --- --- --- --- --- ---
--G --A --A --A --A --- --T ---

GTA TAC AAA TTG AGG AGA ACC CTT
--G --- --G C-- --- --- --A --G
--C --- --- --- C-A C-C --G --A

ATT TTC CAG TGG GCT GAT TCC AGG
--C --- --- --- --C --C AG- --A
--C --- --A --- --G --- --G C-A

GGC CCT CTT GAA GGG GAG GAG TTG
--- --- --G --G --C --A --- C--
--A --A --C --- --- --A --- C-A

GAA CAC TCT CAA GAG ATC ACT TGG
--G --- AGC --G --- --- --A ---
--- --T --A --- --A --A --A ---

GAC GAT GAT ACT GAA TTC GTC GGA
--- --- --C --A --G --T --G --C
--T --C --- --G --- --- --T --T

TTG CAA ATG AGA GTG AGC GCA AGA
C-- --G --- --- --- TCT --T C-G
C-C --- --- --- --C TCG --- C--

CAA TGT CAT ATT CAA GGC AGG ATC
--G --C --C --C --G --- --A ---
--- --- --C --A --- --A --A --A

TGG TGT ATC GAC ATG AAC TCG AGG
--- --C --- --- --- --- AGC ---
--- --- --A --- --- --T --A C-T

GCA TGT CAA CTA TGG TCT GAC ATG

```

--T --C --G --G --- AGC --- ---  
--G --- --- --C --- --C --- ---

TCT CTT CAG ACA CAA AGG TCT GAA  
AGC --G --- --- --G --- --- --G  
--G --C --A --G --- C-A --G ---

GAG GAC AAA GAC TCT TCT CTG CTT  
--- --- --G --- AGC AGC --- --C  
--A --T --- --T --G --C --C ---

TTA GAA TAA  
C-G --G ---  
C-C --- ---
